# Supplementary material for: A global reptile assessment highlights shared conservation needs of tetrapods
Source: PubMed Central journal article supplement (PMC9095493; doi:10.1038/s41586-022-04664-7), 2022-04-27
Supplement: 41586_2022_4664_MOESM1_ESM.pdf [file 41586_2022_4664_MOESM1_ESM.pdf]

## Supplementary information

---

# A global reptile assessment highlights shared conservation needs of tetrapods

---

In the format provided by the authors and unedited

# Global Reptile Assessment Shows Commonality of Tetrapod Conservation Needs

By Cox, Young, et al.

## SUPPLEMENTARY INFORMATION

### Supplementary Note 1

#### List of Assessors

The following people contributed to the assessment of at least one reptile species used in this study. Assessors that are also authors either provided substantial unpublished datasets, hosted assessment workshops and contributed to numerous assessments, and/or served as a reptile Red List Authority.

S. Abdala, C. Abrahão, M. Acevedo, N. Achyuthan, V. Acosta Chaves, K. Adolphs, R. Aengals, L. Afuang, I. Agarwal, A. Agasyan, A. Aguayo, R. Aguayo, C. Aguilar, N. Rakotondrazafy, R. Ajtic, G. Akani, F. Akarsu, A. Al Johany, M. Al Jumaily, K. Al Rasbi, G. Alexander, A. Allison, P. Almeida-Santos, A. Almendáriz, J. Alonso, A. Aloufi, Y. Amapou, V. Amaral de Menezes, Y. Amepou, A. Amey, Z. Amr, N. Ananjeva, C. Anderson, S. Anderson, C. Andrés, F. Andreone, A. Andriamazava, R. Andriantsimanarilafy, N. Angeli, M. Anjeriniaina, R. Antelo, R. Antolin, S. Anuar, J. Aparicio, D. Ardon, A. Argôlo, D. Ariano-Sánchez, E. Arida, A. Ariefiandy, J. Arredondo, A. Arteaga-Navarro, V. Arzamendia, M. As-singily, S. Astrongatt, S. Augros, M. Auliya, C. Austin, A. Avci, L. Avila, R. Ávila, T. Avila-Pires, R. Avilés, F. Ayala, M. Azmi, E. Baard, V. Bachraz, S. S. Bafti, S. Baha El Din, R. Bain, P. Baker, S. Balaguera-Reina, E. Ballesteros, K. Balta Abadie, M. J. Bamford, G. Baorong, N. Baptista, R. Baptista de Oliveira, F. Barbo, C. Barrio-Amorós, M. Barros, L. Bassetti, Y. Bataus, M. Bates, A. Batista, J. Bauder, A. Bauer, J. Bayliss, F. Becker, M. Behangana, S. Behbehani, N. Behler, A. Belouskova, D.

Bennett, J. Beraducci, R. Bérnils, E. Bevan, M. Bezuijen, S. Bhattarai, J. Bi, T. Blanck, C.  
Block, B. Bock, M. Böhm, W. Böhme, W. Bolívar, F. Bonilla, P. Bora, B. Borczyk, M. Borges-  
Martins, D. M. Borges-Nojosa, L. Borkin, A. Borzee, M. Botejue, R. Bour, E. Bourguet, A.  
Bouteiller, P. Bowles, R. Boycott, K. Bradley, L. Brady, W. Branch, R. Bressan, M. Breuil, J.  
Brito, D. Broadley, R. Brown, M. Bruton, S. Buckland, S. Buckner, E. Buongermini, M. Burger,  
R. L. Burke, F. Burton, S. Busais, J. Buskirk, L. Bustamante, M. Cabrera, P. Cacciali, A.  
Caccone, B. Cai, J. R. Caicedo, M. Calderón, B. Camera, J. Campbell, Z. Campos, C. Canales  
Ramirez, L. Canseco-Márquez, A. Captain, R. Cardoso Vieira, A. Carpenter, S. Carranza, S.  
Carreira, R. Carreras De León, P. Casale, F. Castro, A. Catenazzi, G. Catt, L. Cayot, S. Cechin,  
L. Ceríaco, E. H. Chan, T. Chan-Ard, Y. Chapeta, D. Chapple, G. Chaves, J. C. Chavez, G.  
Chavez, J. Chenga, M. Cheylan, Z. Chifundera, J. Chippaux, M. Chirikova, L. Chirio, B.  
Choudhury, S. Chowfin, C. Ciofi, D. F. Cisneros-Heredia, S. Clayson, N. Clemann, D.  
Cogalniceanu, H. Cogger, F. Colacicco, N. Cole, G. Colli, G. Colosimo, T. Colston, X.  
Combrink, W. Conradie, C. Cortez, C. Corti, G. Costa, H. Costa, M. Cota, P. Couper, T.  
Courtney, M. Coutinho, M. Cowan, N. Cox, M. Craig, J. Crnobrnja-Isailovic, P. Crochet, A.  
Crottini, F. Cruz, M. Cunningham, T. da Costa, O. da Cunha, C. F. da Rocha, J. Daltry, P.  
Danaisawat, A. Das, I. Das, J. Dawson, J. Daza, N. D'Cruze, L. de Alencar, S. de Alwis  
Goonatilake, S. de Barcelos Ribeiro, M. A. de Freitas, C. De Haan, J. de Leon, M. de Lourdes  
Vázquez-Cruz, G. de Moura, K. de Queiroz, A. de Silva, R. De Silva, A. de Villiers, V. Deepak,  
M. Dehling, M. del Carmen Blázquez, M. del Rosario Castañeda, E. del Valle, E. Delima, A.  
Demegillo, M. Deuss, K. Deuti, N. Dewhurst, M. Dewynter, D. Di Pietro, T. Diagne, S. Díaz, C.  
Dickman, A. Diesmos, M. Diesmos, M. Dimaki, J. Dimalibot, L. Dirksen, T. Doan, M. Dorcas, I.  
Doronin, P. Doughty, J. Draque, G. Drummond, P. Duengkae, T. Dujsebayaeva, T. Duval, Q.  
Dwyer, A. Echternacht, T. Edwards, D. Egan, E. Eid, C. Eisemberg, E. H. El Mouden, R. Ellis, J.

Els, R. Elsey, D. Embert, J. Emery, E. Eniang, P. Espejo, A. Espinosa-Blanco, R. Espinoza, A. Estrades, E. Etchepare, H. Farooq, A. Feldman, J. Fenker, A. Fenner, D. Ferguson, V. L. Ferreira, C. Figuerola, M. Firoz Ahmed, R. Fisher, L. Fitzgerald, M. Flecks, O. Flores-Villela, J. Fong, A. Fong, S. Ford, F. França, F. Franco, S. French, U. Fritz, D. Frost, D. Gabadage, H. Gadsden, G. Gagliardi, M. Gaiarsa, G. Gaikhorst, N. Gallego-Garcia, S. Ganesan, S. R. Ganesh, M. Garcia, A. García Rodríguez, J. García-Pérez, A. Gardner, C. Garin, J. Gatus, M. Gaulke, P. Geniez, G. Gentile, A. Georges, G. Gerber, J. Gerlach, H. Ghaffari, A. Ghosh, J. P. Gibbs, R. Gibson, J. Gil-Escobedo, G. Gillespie, A. Giraud, V. Giri, M. Girondot, F. Glaw, M. Goder, N. Goicoechea Rodriguez, S. Goldberg, E. Golynsky, R. Gomès, R. Gomes Faria, L. Gonzales, J. C. Gonzalez, E. Goode, A. B. C. Goode, D. Gower, T. Grant, K. Gray, E. Greenbaum, M. Greenlees, C. Grieco, R. Griffiths, L. Grismer, N. Guillerault, M. Guinea, S. Gunawardene, J. Guntoro, X. Guo, P. Guo, P. Gutierrez, G. L. Gutiérrez de la Cruz, P. Gutiérrez-Cárdenas, I. J. Hagen, J. Hallermann, A. Hamidy, A. Hamilton, P. Hamilton, G. Hammerson, k. Hare, P. Harlow, M. Harvey, C. Hasbún, S. Hathaway, S. Hauser, O. Hawlitschek, I. Haxhiu, A. Hector, B. Hedges, E. Hema, R. Henderson, E. Henningheim, R. Hitchmough, A. I. Hladki, H. Hoang, R. Hobson, M. Hofmeyr, B. Hollingsworth, M. Hoogmoed, B. Horne, P. Horner, J. Horrocks, C. Hoskin, R. How, K. Howell, S. Hraoui-Bloquet, S. Huang, M. Hutchinson, M. Ibáñez, R. Ibáñez, J. Imansyah, S. Inchaustegui, I. Ineich, R. Inger, Y. Ioannidis, S. Isberg, D. Iskandar, N. Jacobsen, M. Jallow, C. Jaramillo, D. Jayasekara, D. Jelic, H. Jenkins, R. Jenkins, A. Jerez, T. Jessop, X. Ji, H. Jiang, J. Jiang, O. Jiménez, U. Joger, R. Joglar, J. Johnny, J. Johnson, C. Jones, J. Jose, R. Jose, H. Jourdan, J. O. Juvik, J. Kabigumila, F. Kacoliris, M. Kamrul Hasan, M. Kamsi, D. Kandambi, S. Kannishka, A. Karl, B. Karlsdottir, M. Kartje, S. Karunarathna, Y. Kasaka, Y. Kaska, R. Kawashita-Ribeiro, U. Kaya, J. Kelly, S. Keogh, T. Keswick, M. M. Khan, M. Khan, M. Khan, N. Kidera, M. Kiefer, R. Kiester, C. Knapp, C. Koch, A. Koch, S. Koenig,

G. Köhler, P. Kok, P. Kornacker, L. Krecsák, G. Kuchling, N. U. Kulkarni, K. Kumar, P. Kumari de Silva, Y. Kumlutas, C. Kusamba, M. Kusrini, M. Kyek, E. La Marca, R. Labanowski, A. Lagrange, W. Lamar, M. Landestoy, J. Lang, R. Langstroth, A. Larriera, M. Lau, P. Lavin, M. LeBreton, M. Ledesma, J. Lee, N. LeGrand Gonwouo, E. Lehr, D. Leite, M. Leite Oliveira, M. Lettink, T. Leuteritz, S. Lewis, P. Li, R. Lilley, A. Lima, S. Lin, C. Linkem, P. Lintott, C. Lippai, S. Litvinchuk, A. Llobet, R. Lloyd, S. Loader, A. Lobo, G. Lobos, D. Loebmann, V. Loehr, M. Logan, M. López-Luna, S. Lötters, L. Luiselli, L. Luiz, V. Lukoschek, M. Lundberg, I. Luque, V. Luu, P. Lymberakis, S. Macdonald, R. Macey, A. MacLeod, M. Madala, M. Madawala, W. Magnusson, D. L. Mahler, D. Mallon, C. Malone, P. Malonza, R. Mandujano, R. Maneyro, C. Manolis, U. Manthey, J. Marais, Y. Marambio, B. Maritz, O. Marques, C. Márquez, L. Marquez, R. Márquez, A. Martinez, I. Martinez Solano, F. Martínez-Freiría, M. Martins, B. Maryan, D. F. Maryon, G. Maschio, G. Masterson, J. Mateo, L. Mavoungou, G. Mayer, T. Mazuch, T. McCormack, M. McCoy, S. McCoy, J. McCranie, P. McDonald, J. McGuire, J. Measey, K. Mebert, S. Meiri, C. Melendez Torres, J. Mella, D. Melnikov, J. Melville, F. Mendoza-Quijano, M. Menegon, V. P. Mercado, S. Métrailler, A. Meyer, D. Michael, P. Micucci, A. H. Miller, H. Milligan, K. Milto, E. Miranda, N. Mitchell, R. A. Mittermeier, E. Mizsei, A. Mobaraki, S. Mohammed, P. Mohapatra, D. Moll, E. Moll, P. Molur, S. Molur, O. Monson, R. Montero, C. Montgomery, O. Monzón, R. Mootoocurpen, M. Morales-Betancourt, J. Morales-Mávil, W. Moral-Uribina, J. Moravec, R. Moreno, C. Moritz, T. Mott, A. M. Disi, L. F. Mouton, C. Msuya, D. Mulcahy, F. Muniz, M. Munkhbaatar, K. Munkhbayar, G. Munoz, A. Muñoz, A. Muñoz-Alonso, J. Murphy, C. Murthy, R. Mwaya, S. Narayanan, R. Nazarov, K. Nelson, H. Nettmann, W. Ngalason, H. N. Ngo, N. S. Nguyen, T. Nguyen, J. M. Ngwava, B. Niagate, K. Nicholson, G. Nilson, C. Nogueira, S. Nouira, H. Nunez, J. Nunez, D. Nuridjanov, M. Oliveira, R. Oliveira, P. Oliver, K.O. Chan, N. Orlov, V. Orlova, A. Ortega, J. C. Ortiz, M. O'Shea, H. Ota, P. Oubotar,

L. Outlaw, N. Pacheco-Hoyos, V. Páez, L. M. Paguntalan, S. Pal, R. Palomo-Ramos, R. Paltridge, N. Panitvong, T. Papenfuss, F. Parker, S. Pasachnik, P. Passos, G. Patterson, O. Pauwels, P. Pawangkanan, C. Payne, N. Pelegrin, J. Penner, D. Pereira, N. Perera, J. Perez, P. Perez, R. Perez Maciel, V. Pérez Mellado, F. Petrozzi, S. Phimmachak, D. Pietersen, C. Piña, R. Platenberg, K. Platt, S. Platt, J. Pleguezuelos, A. Plumptre, R. Podloucky, S. Poe, C. C. Pomaro, P. Ponce-Campos, G. Pontes, L. Porras, R. Powell, G. Powney, M. Prabhu, K. Prasad Limbu, P. Praschag, D. Proetzel, A. Prudente, A. Puente-Rolón, D. Purwandana, V. Pushpamal, E. Quah, G. Quintero Díaz, A. Quiroz Rodriguez, N. Rabibisoa, R. Radder, J. Rafanomezantsoa, S. C. Rahman, A. Raimundo, D. Rakotomalala, H. Rakotondravony, J. Ramanamanjato, M. Ramesh, M. P. Ramirez, C. Ramirez Peralta, H. Randriamahazo, C. Randrianantoandro, H. Randrianasolo, J. Randrianiriana, H. Randrianizahana, D. Rao, A. Raselimanana, A. Rasmussen, F. Ratsavina, C. Raxworthy, M. Read, R. Recoder, S. Reilly, J. Ren, J. M. Renjifo, A. Restrepo, C. Reyes-Puig, G. Reynolds, R. G. Reynolds, V. Reynoso, A. Rhodin, L. Ribeiro, M. A. Ribeiro Júnior, S. Richards, N. Richman, E. Rico, J. Ríos-Arana, E. Riservato, G. Rivas, R. C. Rivera-Arroyo, A. Riyanto, S. Roberton, P. Robertson, E. Robsomanitrاندراسانا, G. Rodda, D. Rödder, M. Rödel, J. Rodrigues dos Santos Silva, C. Rodriguez, L. Rodriguez, J. Rodríguez, A. Romano, P. Roopa, W. Roosenburg, R. G. Rosell-Ambal, P. Rosen, P. Ross, S. Roussos, A. Roy, K. Ruhomaun, M. Ruiz de Gamboa, N. Rusli, E. Rustamov, G. Saborío, R. Sadek, R. Sadlier, I. Safari, H. Salinas Matus, N. Sallabery, D. Samarasinghe, P. Samarawickrama, M. Sanchez, J. C. Sánchez, K. Sanders, C. Sanderson, G. Santos-Barrera, C. Sardinha, M. Sasa, P. Sá-Sousa, T. Sattorov, N. Sawant, R. Sawaya, D. Scantlebury, W. Schargel, U. Schepp, F. Schmidt, B. Schmidt, A. Schmitz, H. Schneider, S. Schoppe, N. Scott, G. Scrocchi, J. Sears, G. Segniagbeto, J. Segovia, A. Seijas, M. Sevinç, G. Shankar, M. Sharifi, G. Shea, C. Shepherd, A. Shestopal, H. Shi, L. Shi, Y. Shin, R. Shine, M. Shirley, M. Shobrak, B. Shwedick, A. Silveira, B. Simpson, R. Sindaco, S.

Singh, P. Siroski, A. Sivaruban, T. Slimani, N. Smaniotto, K. Soe Lwin, G. Solmu, A.  
Solórzano, R. Somaweera, S. Sondhi, P. Soorae, S. Spawls, R. Sreekar, B. Srinivasulu, C.  
Srinivasulu, P. Stafford, C. Stanford, A. Staniewicz, B. Sterijovski, J. Stipala, C. Strüssmann, B.  
Stuart, A. Stubbs, R. Stuebing, J. Suárez, M. Sumontha, J. Sunyer, M. Suraj, S. Sweet, E. Sy, M.  
Szabolcs, C. Tala, O. Tallowin, G. Tampos, W. Tapia, E. Taskavak, V. Tatayah, R. Teale, L.  
Tedeschi, Y. Tempsiripong, K. Terbish, W. Thaksintham, S. Thakur, A. A.T. Amarasinghe, R.  
Thomas, S. Thomson, N. Thy, C. Tilbury, R. Timmins, M. Tinôco, M. Tiwari, B. Tjaturadi, M.  
Tognelli, V. Tok, K. Tolley, P. Tolson, L. Tomovic, S. Torquato da Silva, C. Torres, C.  
Toudonou, J. Townsend, J. Trape, P. Trivalarait, S.-Y. Tsai, S. Tshewang, A. Tucker, B.  
Tuniyev, S. Tuniyev, O. Turkozan, A. Turner, M. Ubeda, I. Ugurtas, V. Uhlig, K. Ukuwela, N.  
Urbina, N. Üzüm, R. Valadao, J. Valencia, L. Valentine, P. Valladares, S. van Barneveld, G. van  
Buurt, M. P. van den Burg, P. P. van Dijk, M. van Schingen, M. van Weerd, D. van Winkel, E.  
Vanderduys, J. Vargas Álvarez, R. Vasconcelos, M. Vaughn, W. Vaz, P. Vaz Pinto, J. Vazquez  
Díaz, L. Vega, J. Velasco, M. Velasco, A. Velasco, D. Vencatasamy, M. Vences, P. Venegas, M.  
Venz, L. Verburgt, L. Verrastro Viñas, M. Veselý, P. Victoriano, M. Vidal, D. Vidanapathirana,  
S. Vijayakumar, S. Vinke, T. Vinke, G. Vogel, M. Vogrin, R. Vogt, R. Vyas, P. Wagner, P.  
Walker, R. Walker, B. Wallace, V. Wallach, T. Waller, J. Wang, L. Wang, Y. Wang, Y. Wang,  
J. T. Wangyal, E. Wapstra, O. Wearn, J. Webb, J. Weeber, F. Weinsheimer, F. Werneck, Y.  
Werner, A. Westerström, A. Whitaker, M. Whiting, T. Wibbels, M. Wickramasinghe, N.  
Wickramasinghe, N. Wijethilaka, S. Wikramanyake, J. Wilkinson, J. Williams, T. Wilms, S.  
Wilson, B. Wilson, L. Wilson, P. Wilson, G. Winck, D. Wingate, G. Wogan, J. Woinarski, R. C.  
Wood, A. Woodward, E. Wostl, S. Wren, X. Wu, M. Wynn, G. Xiang, Q. Xiang, F. Xie, Y. Xie,  
M. Yáñez-Muñoz, J. Yang, C. Yeniyurt, H. Zaher, T. Zamin, G. Zamora, E. Zarza-Franco, A.  
Zassi-Boulou, W. Zhao, W. Zhou, Z. Zhou, J. Zichy-Woinarski, T. Ziegler, G. Zug.

## Supplementary Table 1.

In-person and remote workshops undertaken as part of the Global Reptile Assessment.

| <b>Year</b> | <b>Region</b>                                                           | <b>Assessment Type</b>              |
|-------------|-------------------------------------------------------------------------|-------------------------------------|
| 2004        | Mediterranean                                                           | Workshop                            |
| 2005        | Mexico                                                                  | Workshop                            |
| 2006        | Northern and Central Europe                                             | Workshop                            |
| 2006        | Seychelles                                                              | Remote assessment                   |
| 2006        | North America                                                           | Remote assessment                   |
| 2008        | Caucasus, Iran, and Iraq                                                | Workshop                            |
| 2008        | Philippines                                                             | Workshop                            |
| 2009        | Caribbean (iguanas)                                                     | Workshop                            |
| 2011        | Madagascar                                                              | Workshop                            |
| 2011        | Comoros                                                                 | Remote assessment                   |
| 2011        | China and Southeast Asia (snakes)                                       | Workshop                            |
| 2011        | Oceania                                                                 | Workshop                            |
| 2012        | Arabian Peninsula                                                       | Workshop                            |
| 2012        | Socotra                                                                 | Remote assessment                   |
| 2012        | Central America                                                         | Workshop                            |
| 2012        | West Africa                                                             | Workshop                            |
| 2012        | Cabo Verde                                                              | Remote assessment                   |
| 2012        | Brazil (snakes)                                                         | ICMBio workshops (two held in 2012) |
| 2013        | Northwestern Andes                                                      | Workshop                            |
| 2013        | Western Ghats                                                           | Workshop                            |
| 2014        | New Guinea                                                              | Workshop                            |
| 2014        | East Africa                                                             | Workshop                            |
| 2014        | Northern Andes                                                          | Workshop                            |
| 2014        | Southeastern South America                                              | Workshop (excluded Brazil)          |
| 2014        | Widespread species of the Amazon Basin,<br>Guiana Shield, and Venezuela | Workshop                            |
| 2015        | Chile                                                                   | Workshop                            |
| 2015        | Caribbean                                                               | Workshop                            |
| 2015        | Cuba                                                                    | Remote assessment                   |
| 2015        | Venezuela                                                               | Workshop                            |
| 2016        | Aruba, Bonaire and Curaçao                                              | Remote assessment                   |
| 2016        | Central Asia                                                            | Workshop                            |
| 2016        | Japan                                                                   | Remote assessment                   |
| 2017        | Western Australia                                                       | Workshop                            |
| 2017        | Eastern Australia                                                       | Workshop                            |
| 2018        | Southeast Asia (lizards)                                                | Workshop                            |
| 2018        | China (lizards)                                                         | Workshop                            |
| 2019        | Korean Peninsula                                                        | Remote assessment                   |
| 2019        | Central and Southern Africa                                             | Workshop                            |
| 2019        | Wallacea                                                                | Workshop                            |



| <b>Year</b> | <b>Region</b>       | <b>Assessment Type</b>                     |
|-------------|---------------------|--------------------------------------------|
| 2019        | Mainland South Asia | Workshop                                   |
| 2019        | Pakistan            | Remote assessment                          |
| 2019        | Sri Lanka           | Workshop                                   |
| 2010/2017   | New Caledonia       | IUCN workshop/national assessment workshop |
| 2013/2014   | Brazil (lizards)    | ICMBio workshops                           |
| 2013/2018   | South Africa        | SANBI workshops                            |
| 2016-2019   | Mascarenes          | Remote assessment                          |
| 2018-2019   | New Zealand         | Hybrid workshop/remote assessment          |
| 2017-2019   | Horn of Africa      | Hybrid remote assessment/meeting           |

## Supplementary Table 2.

Summary of Red List Categories for all families of reptiles. See Methods for calculation of best estimate of percent threatened, which does not include EX or EW species.

| Order/Suborder/Family | LC   | NT  | DD   | VU  | EN  | CR  | EW | EX | Total | % DD  | % Threatened |
|-----------------------|------|-----|------|-----|-----|-----|----|----|-------|-------|--------------|
| Crocodylia            | 12   |     |      | 5   |     | 7   |    |    | 24    | 0.0%  | 50.0%        |
| Crocodylia            | 12   |     |      | 5   |     | 7   |    |    | 24    | 0.0%  | 50.0%        |
| Alligatoridae         | 7    |     |      |     |     | 1   |    |    | 8     | 0.0%  | 12.5%        |
| Crocodylidae          | 5    |     |      | 5   |     | 5   |    |    | 15    | 0.0%  | 66.7%        |
| Gavialidae            |      |     |      |     |     | 1   |    |    | 1     | 0.0%  | 100.0%       |
| Rhynchocephalia       | 1    |     |      |     |     |     |    |    | 1     | 0.0%  | 0.0%         |
| Rhynocephalia         | 1    |     |      |     |     |     |    |    | 1     | 0.0%  | 0.0%         |
| Sphenodontidae        | 1    |     |      |     |     |     |    |    | 1     | 0.0%  | 0.0%         |
| Squamata              | 6146 | 532 | 1485 | 557 | 724 | 350 | 2  | 24 | 9820  | 15.1% | 19.6%        |
| "Lizards"             | 3905 | 386 | 800  | 392 | 545 | 266 | 2  | 20 | 6316  | 12.7% | 21.9%        |
| Anguimorpha           | 103  | 6   | 28   | 11  | 42  | 8   |    |    | 198   | 14.1% | 35.9%        |
| Anguidae              | 55   | 3   | 17   | 8   | 28  | 7   |    |    | 118   | 14.4% | 42.6%        |
| Anniellidae           | 1    |     |      |     | 1   |     |    |    | 2     | 0.0%  | 50.0%        |
| Helodermatidae        | 1    | 1   |      |     |     |     |    |    | 2     | 0.0%  | 0.0%         |
| Lanthanotidae         |      |     |      |     | 1   |     |    |    | 1     | 0.0%  | 100.0%       |
| Shinisauridae         |      |     |      |     | 1   |     |    |    | 1     | 0.0%  | 100.0%       |
| Varanidae             | 44   | 2   | 10   | 2   | 9   | 1   |    |    | 68    | 14.7% | 20.7%        |
| Xenosauridae          | 2    |     | 1    | 1   | 2   |     |    |    | 6     | 16.7% | 60.0%        |
| Dibamia               | 7    | 2   | 10   | 1   | 3   | 1   |    |    | 24    | 41.7% | 35.7%        |
| Dibamidae             | 7    | 2   | 10   | 1   | 3   | 1   |    |    | 24    | 41.7% | 35.7%        |
| Gekkota               | 994  | 109 | 240  | 117 | 149 | 91  | 1  | 4  | 1705  | 14.1% | 24.4%        |
| Carphodactylidae      | 22   | 3   |      | 2   | 2   | 2   |    |    | 31    | 0.0%  | 19.4%        |
| Diplodactylidae       | 89   | 14  | 6    | 13  | 17  | 9   |    | 1  | 149   | 4.0%  | 27.5%        |
| Eublepharidae         | 17   | 1   | 3    | 3   | 9   | 4   |    |    | 37    | 8.1%  | 47.1%        |
| Gekkonidae            | 635  | 64  | 201  | 84  | 73  | 57  | 1  | 3  | 1118  | 18.0% | 23.4%        |
| Phyllodactylidae      | 81   | 9   | 9    | 6   | 7   | 5   |    |    | 117   | 7.7%  | 16.7%        |
| Pygopodidae           | 37   | 1   | 3    | 1   | 3   |     |    |    | 45    | 6.7%  | 9.5%         |
| Sphaerodactylidae     | 113  | 17  | 18   | 8   | 38  | 14  |    |    | 208   | 8.7%  | 31.6%        |
| Iguania               | 1121 | 126 | 162  | 129 | 168 | 68  |    | 4  | 1778  | 9.1%  | 22.6%        |
| Agamidae              | 353  | 20  | 61   | 28  | 25  | 10  |    |    | 497   | 12.3% | 14.4%        |
| Chamaeleonidae        | 79   | 39  | 10   | 22  | 42  | 10  |    |    | 202   | 5.0%  | 38.5%        |
| Corytophanidae        | 9    |     |      |     |     |     |    |    | 9     | 0.0%  | 0.0%         |
| Crotaphytidae         | 9    |     |      | 1   | 2   |     |    |    | 12    | 0.0%  | 25.0%        |
| Dactyloidae           | 215  | 36  | 39   | 20  | 48  | 22  |    |    | 380   | 10.3% | 26.4%        |
| Hoplocercidae         | 11   |     |      | 4   | 2   |     |    |    | 17    | 0.0%  | 35.3%        |
| Iguanidae             | 8    | 3   | 2    | 11  | 12  | 8   |    | 1  | 45    | 4.4%  | 73.8%        |
| Leiosauridae          | 20   | 1   | 4    | 2   | 3   | 2   |    |    | 32    | 12.5% | 25.0%        |
| Liolaemidae           | 207  | 12  | 22   | 19  | 21  | 8   |    |    | 289   | 7.6%  | 18.0%        |
| Opluridae             | 7    |     |      |     |     |     |    |    | 7     | 0.0%  | 0.0%         |
| Phrynosomatidae       | 102  | 7   | 7    | 9   | 6   | 1   |    |    | 132   | 5.3%  | 12.8%        |
| Polychrotidae         | 5    |     | 1    | 1   |     |     |    |    | 7     | 14.3% | 16.7%        |
| Tropiduridae          | 96   | 8   | 16   | 12  | 7   | 7   |    | 3  | 149   | 10.7% | 20.0%        |

| <b>Order/Suborder/Family</b> | <b>LC</b> | <b>NT</b> | <b>DD</b> | <b>VU</b> | <b>EN</b> | <b>CR</b> | <b>EW</b> | <b>EX</b> | <b>Total</b> | <b>% DD</b> | <b>% Threatened</b> |
|------------------------------|-----------|-----------|-----------|-----------|-----------|-----------|-----------|-----------|--------------|-------------|---------------------|
| Lacertoidea                  | 574       | 56        | 125       | 33        | 76        | 27        |           | 2         | 893          | 14.0%       | 17.8%               |
| Amphisbaenidae               | 98        | 7         | 39        | 6         | 14        | 6         |           |           | 170          | 22.9%       | 19.8%               |
| Bipedidae                    | 3         |           |           |           |           |           |           |           | 3            | 0.0%        | 0.0%                |
| Cadeidae                     | 2         |           |           |           |           |           |           |           | 2            | 0.0%        | 0.0%                |
| Gymnophthalmidae             | 141       | 14        | 47        | 13        | 30        | 5         |           |           | 250          | 18.8%       | 23.6%               |
| Lacertidae                   | 220       | 23        | 26        | 8         | 25        | 12        |           |           | 314          | 8.3%        | 15.6%               |
| Rhineuridae                  | 1         |           |           |           |           |           |           |           | 1            | 0.0%        | 0.0%                |
| Teiidae                      | 106       | 12        | 10        | 6         | 7         | 4         |           | 2         | 147          | 6.8%        | 12.6%               |
| Trogonophidae                | 3         |           | 3         |           |           |           |           |           | 6            | 50.0%       | 0.0%                |
| Scinciformata                | 1106      | 87        | 235       | 101       | 107       | 71        | 1         | 10        | 1718         | 13.7%       | 18.9%               |
| Cordylidae                   | 58        | 3         | 4         | 2         | 1         |           |           |           | 68           | 5.9%        | 4.7%                |
| Gerrhosauridae               | 26        | 3         | 1         | 6         | 2         |           |           | 1         | 39           | 2.6%        | 21.6%               |
| Scincidae                    | 1009      | 79        | 222       | 90        | 103       | 71        | 1         | 9         | 1584         | 14.0%       | 19.5%               |
| Xantusiidae                  | 13        | 2         | 8         | 3         | 1         |           |           |           | 27           | 29.6%       | 21.1%               |
| Serpentes ("Snakes")         | 2241      | 146       | 685       | 165       | 179       | 84        |           | 4         | 3504         | 19.5%       | 15.2%               |
| Acrochordidae                | 3         |           |           |           |           |           |           |           | 3            | 0.0%        | 0.0%                |
| Aniliidae                    | 1         |           |           |           |           |           |           |           | 1            | 0.0%        | 0.0%                |
| Anomalepididae               | 7         |           | 11        |           |           |           |           |           | 18           | 61.1%       | 0.0%                |
| Anomochilidae                | 1         |           | 2         |           |           |           |           |           | 3            | 66.7%       | 0.0%                |
| Atractaspidae                | 63        | 1         | 7         |           |           |           |           |           | 71           | 9.9%        | 0.0%                |
| Boidae                       | 41        | 8         | 2         | 3         | 5         | 1         |           |           | 60           | 3.3%        | 15.5%               |
| Bolyeridae                   |           |           |           | 1         |           |           |           | 1         | 2            | 0.0%        | 100.0%              |
| Calamariidae                 | 41        |           | 37        | 4         | 4         | 4         |           |           | 90           | 41.1%       | 22.6%               |
| Colubridae                   | 540       | 24        | 114       | 25        | 23        | 10        |           |           | 736          | 15.5%       | 9.3%                |
| Cylindrophiidae              | 2         | 1         | 7         | 1         |           | 1         |           |           | 12           | 58.3%       | 40.0%               |
| Dipsadidae                   | 452       | 32        | 154       | 33        | 41        | 24        |           | 2         | 738          | 20.9%       | 16.8%               |
| Elapidae                     | 268       | 15        | 51        | 16        | 9         | 2         |           |           | 361          | 14.1%       | 8.7%                |
| Gerrhopilidae                | 3         |           | 12        |           | 1         | 1         |           |           | 17           | 70.6%       | 40.0%               |
| Grayiidae                    | 4         |           |           |           |           |           |           |           | 4            | 0.0%        | 0.0%                |
| Homalopsidae                 | 20        | 1         | 23        | 2         | 2         |           |           |           | 48           | 47.9%       | 16.0%               |
| Lamprophiidae                | 69        |           | 9         |           | 1         |           |           |           | 79           | 11.4%       | 1.4%                |
| Leptotyphlopidae             | 72        | 2         | 35        | 3         | 2         | 4         |           |           | 118          | 29.7%       | 10.8%               |
| Loxocemidae                  | 1         |           |           |           |           |           |           |           | 1            | 0.0%        | 0.0%                |
| Natricidae                   | 148       | 11        | 42        | 11        | 12        | 4         |           |           | 228          | 18.4%       | 14.5%               |
| Pareidae                     | 14        | 1         | 4         |           |           |           |           |           | 19           | 21.1%       | 0.0%                |
| Prosymnidae                  | 14        |           |           |           | 1         | 1         |           |           | 16           | 0.0%        | 12.5%               |
| Psammophiidae                | 47        | 1         |           | 1         |           |           |           |           | 49           | 0.0%        | 2.0%                |
| Pseudoxenodontidae           | 8         |           | 4         |           |           |           |           |           | 12           | 33.3%       | 0.0%                |
| Pseudoxyrhophiidae           | 52        | 12        | 7         | 11        | 8         | 2         |           |           | 92           | 7.6%        | 24.7%               |
| Pythonidae                   | 24        | 4         | 6         | 6         | 1         |           |           |           | 41           | 14.6%       | 20.0%               |
| Tropidophiidae               | 10        | 4         | 2         | 6         | 9         | 6         |           |           | 37           | 5.4%        | 60.0%               |
| Typhlopidae                  | 120       | 6         | 105       | 7         | 16        | 7         |           | 1         | 262          | 40.1%       | 19.2%               |
| Uropeltidae                  | 12        | 2         | 20        | 4         | 12        | 6         |           |           | 56           | 35.7%       | 61.1%               |
| Viperidae                    | 193       | 20        | 27        | 30        | 32        | 10        |           |           | 312          | 8.7%        | 25.3%               |
| Xenodermidae                 | 9         | 1         | 2         | 1         |           | 1         |           |           | 14           | 14.3%       | 16.7%               |
| Xenopeltidae                 | 2         |           |           |           |           |           |           |           | 2            | 0.0%        | 0.0%                |
| Xenophiidae                  |           |           | 2         |           |           |           |           |           | 2            | 100.0%      | NA                  |
| Testudines                   | 97        | 39        | 22        | 61        | 56        | 69        |           | 7         | 351          | 6.3%        | 57.8%               |
| Testudines                   | 97        | 39        | 22        | 61        | 56        | 69        |           | 7         | 351          | 6.3%        | 57.8%               |
| Carettochelyidae             |           |           |           |           | 1         |           |           |           | 1            | 0.0%        | 100.0%              |
| Chelidae                     | 27        | 9         | 8         | 4         | 4         | 5         |           |           | 57           | 14.0%       | 26.5%               |

| <b>Order/Suborder/Family</b> | <b>LC</b>   | <b>NT</b>  | <b>DD</b>   | <b>VU</b>  | <b>EN</b>  | <b>CR</b>  | <b>EW</b> | <b>EX</b> | <b>Total</b>  | <b>% DD</b>  | <b>%<br/>Threatened</b> |
|------------------------------|-------------|------------|-------------|------------|------------|------------|-----------|-----------|---------------|--------------|-------------------------|
| Cheloniidae                  |             |            | 1           | 2          | 1          | 2          |           |           | 6             | 16.7%        | 100.0%                  |
| Chelydridae                  | 1           | 1          |             | 3          |            |            |           |           | 5             | 0.0%         | 60.0%                   |
| Dermatemydidae               |             |            |             |            |            | 1          |           |           | 1             | 0.0%         | 100.0%                  |
| Dermochelyidae               |             |            |             | 1          |            |            |           |           | 1             | 0.0%         | 100.0%                  |
| Emydidae                     | 16          | 9          | 5           | 15         | 9          | 1          |           |           | 55            | 9.1%         | 50.0%                   |
| Geoemydidae                  | 10          | 9          | 2           | 4          | 20         | 26         |           |           | 71            | 2.8%         | 72.5%                   |
| Kinosternidae                | 19          | 6          |             | 2          |            | 2          |           |           | 29            | 0.0%         | 13.8%                   |
| Pelomedusidae                | 13          | 1          | 4           |            | 1          |            |           |           | 19            | 21.1%        | 6.7%                    |
| Platysternidae               |             |            |             |            |            | 1          |           |           | 1             | 0.0%         | 100.0%                  |
| Podocnemididae               |             |            |             | 4          | 1          | 3          |           |           | 8             | 0.0%         | 100.0%                  |
| Testudinidae                 | 6           | 4          |             | 17         | 12         | 19         |           | 7         | 65            | 0.0%         | 82.8%                   |
| Trionychidae                 | 5           |            | 2           | 9          | 7          | 9          |           |           | 32            | 6.3%         | 83.3%                   |
| <b>Total</b>                 | <b>6256</b> | <b>571</b> | <b>1507</b> | <b>623</b> | <b>780</b> | <b>426</b> | <b>2</b>  | <b>31</b> | <b>10,196</b> | <b>14.8%</b> | <b>21.1%</b>            |

### Supplementary Table 3.

Threatened (Critically Endangered, Endangered, and Vulnerable) tetrapods with ranges that do not overlap with the ranges of any other threatened tetrapod. Analysis performed using range maps developed as part of the extinction risk assessment process.

#### **Birds**

|                                    |                                 |                                 |
|------------------------------------|---------------------------------|---------------------------------|
| <i>Acrocephalus aequinoctialis</i> | <i>Edolisoma nesiotis</i>       | <i>Oreomystis bairdi</i>        |
| <i>Acrocephalus caffer</i>         | <i>Elaenia ridleyana</i>        | <i>Palmeria dolei</i>           |
| <i>Acrocephalus familiaris</i>     | <i>Erythropitta splendida</i>   | <i>Paroreomyza montana</i>      |
| <i>Acrocephalus longirostris</i>   | <i>Eunymphicus uvaeensis</i>    | <i>Passer hemileucus</i>        |
| <i>Acrocephalus rehsei</i>         | <i>Fringilla polatzeki</i>      | <i>Petroica dannefaerdi</i>     |
| <i>Acrocephalus rimitarae</i>      | <i>Gallinula comeri</i>         | <i>Petroica traversi</i>        |
| <i>Acrocephalus taiti</i>          | <i>Geospiza acutirostris</i>    | <i>Pinaroloxias inornata</i>    |
| <i>Acrocephalus vaughani</i>       | <i>Geospiza pauper</i>          | <i>Pomarea iphis</i>            |
| <i>Aerodramus sawtelli</i>         | <i>Geospiza propinqua</i>       | <i>Pomarea mendozae</i>         |
| <i>Alopecoenas erythropterus</i>   | <i>Geospiza septentrionalis</i> | <i>Pomarea nigra</i>            |
| <i>Alopecoenas rubescens</i>       | <i>Hemignathus wilsoni</i>      | <i>Pomarea whitneyi</i>         |
| <i>Anas aucklandica</i>            | <i>Hemiphaga chathamensis</i>   | <i>Pseudonestor xanthophrys</i> |
| <i>Aphrastura masafucae</i>        | <i>Junco insularis</i>          | <i>Ptilinopus chalcurus</i>     |
| <i>Atlantisia rogersi</i>          | <i>Lewinia muelleri</i>         | <i>Ptilinopus chrysogaster</i>  |
| <i>Branta sandvicensis</i>         | <i>Loxioides bailleui</i>       | <i>Ptilinopus huttoni</i>       |
| <i>Charadrius sanctaehelenae</i>   | <i>Loxops caeruleirostris</i>   | <i>Ptilinopus insularis</i>     |
| <i>Chasiempis ibidis</i>           | <i>Loxops coccineus</i>         | <i>Rowettia goughensis</i>      |
| <i>Chasiempis sandwichensis</i>    | <i>Magumma parva</i>            | <i>Sephanoides fernandensis</i> |
| <i>Chasiempis sclateri</i>         | <i>Manuceria mana</i>           | <i>Sittiparus owstoni</i>       |
| <i>Chlorodrepanis flava</i>        | <i>Mayornis schistaceus</i>     | <i>Symposiachrus ateralbus</i>  |
| <i>Chlorodrepanis stejnegeri</i>   | <i>Mimus trifasciatus</i>       | <i>Telespiza cantans</i>        |
| <i>Coccyzus ferrugineus</i>        | <i>Myadestes obscurus</i>       | <i>Todiramphus gambieri</i>     |
| <i>Coenocorypha pusilla</i>        | <i>Myadestes palmeri</i>        | <i>Todiramphus godeffroyi</i>   |
| <i>Cyanoramphus forbesi</i>        | <i>Myiagra cervinicolor</i>     | <i>Todiramphus ruficollaris</i> |
| <i>Cyanoramphus unicolor</i>       | <i>Nesospiza acunhae</i>        | <i>Vini peruviana</i>           |
| <i>Drepanis coccinea</i>           | <i>Nesospiza questi</i>         | <i>Vini stepheni</i>            |
| <i>Ducula aurorae</i>              | <i>Nesospiza wilkinsi</i>       | <i>Vini ultramarina</i>         |
| <i>Ducula galeata</i>              | <i>Nesotriccus ridgwayi</i>     | <i>Zapornia atra</i>            |

#### **Mammals**

|                            |                                  |                             |
|----------------------------|----------------------------------|-----------------------------|
| <i>Echymipera davidi</i>   | <i>Peromyscus dickeyi</i>        | <i>Pteropus rodricensis</i> |
| <i>Lepus insularis</i>     | <i>Peromyscus pseudocrinitus</i> | <i>Rattus nikenii</i>       |
| <i>Mogera uchidai</i>      | <i>Peromyscus sejugis</i>        | <i>Sorex pribilofensis</i>  |
| <i>Peromyscus caniceps</i> | <i>Phalanger alexandrae</i>      |                             |

#### **Reptiles**

|                          |                                  |                                |
|--------------------------|----------------------------------|--------------------------------|
| <i>Alsophis antiquae</i> | <i>Flexiseps valhallae</i>       | <i>Oligosoma fallai</i>        |
| <i>Anolis nelsoni</i>    | <i>Gongylomorphus bojerii</i>    | <i>Phymaturus mallimaccii</i>  |
| <i>Anolis villai</i>     | <i>Lepidodactylus tepukapili</i> | <i>Plestiodon longirostris</i> |

*Aristelliger nelsoni*  
*Aspidoscelis martyr*  
*Bavayia exsuccida*  
*Carinascincus palfreymani*  
*Correlophus belepensis*  
*Cryptoblepharus caudatus*  
*Ctenosaura nolasensis*  
*Cubophis brooksi*

*Liolaemus famatinae*  
*Liolaemus morenoi*  
*Lygodactylus insularis*  
*Mabuya cochonae*  
*Macrovipera schweizeri*  
*Nactus coindemirensis*  
*Nactus serpensinsula*

*Podarcis gaigeae*  
*Podarcis levendis*  
*Podarcis milensis*  
*Uta encantadae*  
*Uta lowei*  
*Uta palmeri*  
*Uta tumidarostra*

### **Amphibians**

*Atelognathus patagonicus*  
*Atelognathus praebasalticus*  
*Atelognathus reverberii*

*Lyciasalamandra helverseni*  
*Oloolygon peixotoi*

*Pelophylax cerigensis*  
*Pleurodema somuncurensis*

### Supplementary Table 4.

Numbers of species and percentages of species threatened of major reptile groups (top) and tetrapod classes (bottom) that occur in caves/subterranean and marine coastal habitats. Marine coastal species included are those that make use of coastal terrestrial habitats (e.g., marine iguana); species were not included if they inhabit the ocean for a significant part of their life cycle (e.g., marine turtles).

| <b>Habitat</b>     | <b>Crocodiles</b> |              | <b>Lizards</b> |              | <b>Snakes</b> |              | <b>Turtles</b> |              |
|--------------------|-------------------|--------------|----------------|--------------|---------------|--------------|----------------|--------------|
|                    | Species           | % Threatened | Species        | % Threatened | Species       | % Threatened | Species        | % Threatened |
| Caves/Subterranean | 0                 | 0.0          | 43             | 36.8         | 7             | 35.0         | 0              | 0.0          |
| Marine Coastal     | 2                 | 50.0         | 60             | 24.7         | 11            | 21.6         | 9              | 60.0         |

  

| <b>Habitat</b>     | <b>Amphibians</b> |              | <b>Birds</b> |              | <b>Mammals</b> |              | <b>Reptiles</b> |              |
|--------------------|-------------------|--------------|--------------|--------------|----------------|--------------|-----------------|--------------|
|                    | Species           | % Threatened | Species      | % Threatened | Species        | % Threatened | Species         | % Threatened |
| Caves/Subterranean | 102               | 51.0         | 24           | 12.5         | 485            | 18.4         | 50              | 36.5         |
| Marine Coastal     | 29                | 10.3         | 215          | 29.8         | 92             | 35.9         | 82              | 26.2         |
